# Supplementary material
Source: publisher figshare collection journal article supplement (https://tandf.figshare.com/articles/dataset/_/6959855)
Supplement: Supplementary file 1 [file 1]

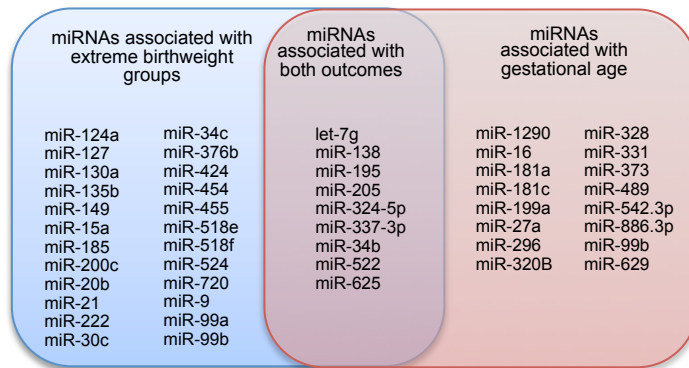

**Figure S1:** Venn diagram showing the list of miRNAs selected in the discovery phase based on their associations with the extreme birthweight groups and/or gestational age for replication analysis.
